# Supplementary material for: Aluminium complexes bearing functionalized trisamido ligands and their reactivity in the polymerization of ε-caprolactone and rac-lactide
Source: Royal Society of Chemistry journal article supplement (doi:10.1039/c0dt00005a), 2010-01-01
Supplement: c0dt00005a.pdf [file c0dt00005a.pdf]

Supporting Information for:  
**Aluminum Complexes Bearing Functionalized Trisamido  
Ligands and their Reactivity in the Polymerization of  $\epsilon$ -  
Caprolactone and *rac*-Lactide**

Marie-Hélène Thibault and Frédéric-Georges Fontaine\*

Département de Chimie, Université Laval, 1045 Avenue de la Médecine, Québec (Québec), Canada, G1V 0A6

\*Email : [frederic.fontaine@chm.ulaval.ca](mailto:frederic.fontaine@chm.ulaval.ca)

Contents

1. Typical Steric Exclusion Chromatograph for the polycaprolactone S2
2. Correlation between the  $m/z$  observed by MALDI-TOF S3
3.  $^{13}\text{C}\{^1\text{H}\}$  experiments for the methyne carbone for the polylactides S4

1-

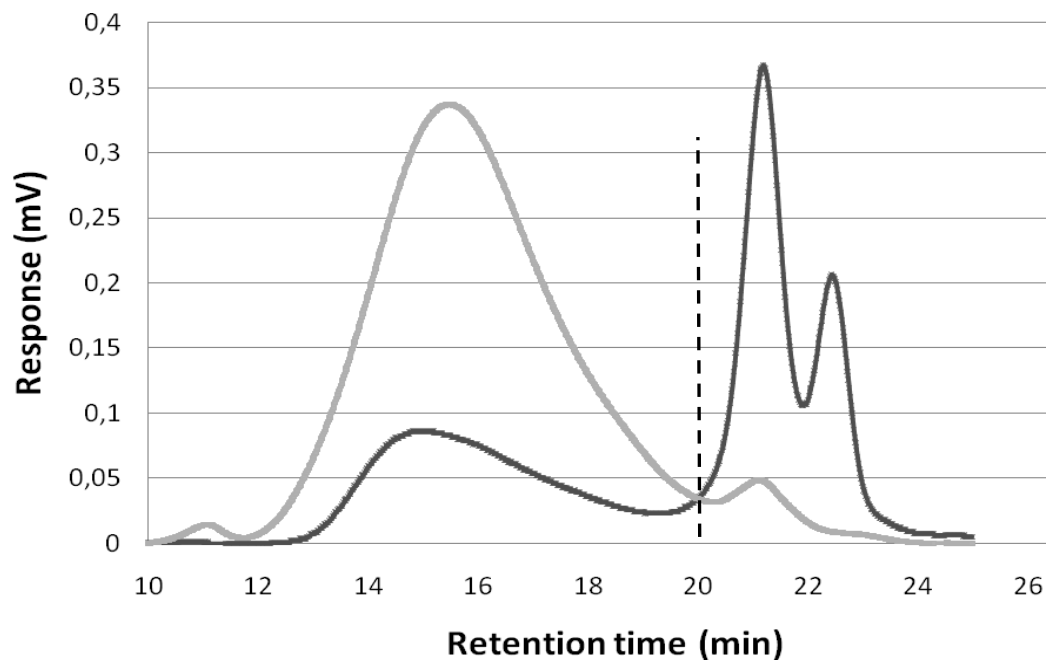

**Figure ESI 1.** SEC traces of entries 3 (dark grey) and 6 (light grey) (see Table 1). The dashed line represents the upper limit for the integration when determining the  $M_n$  and  $M_w$  of the polymers.

2-

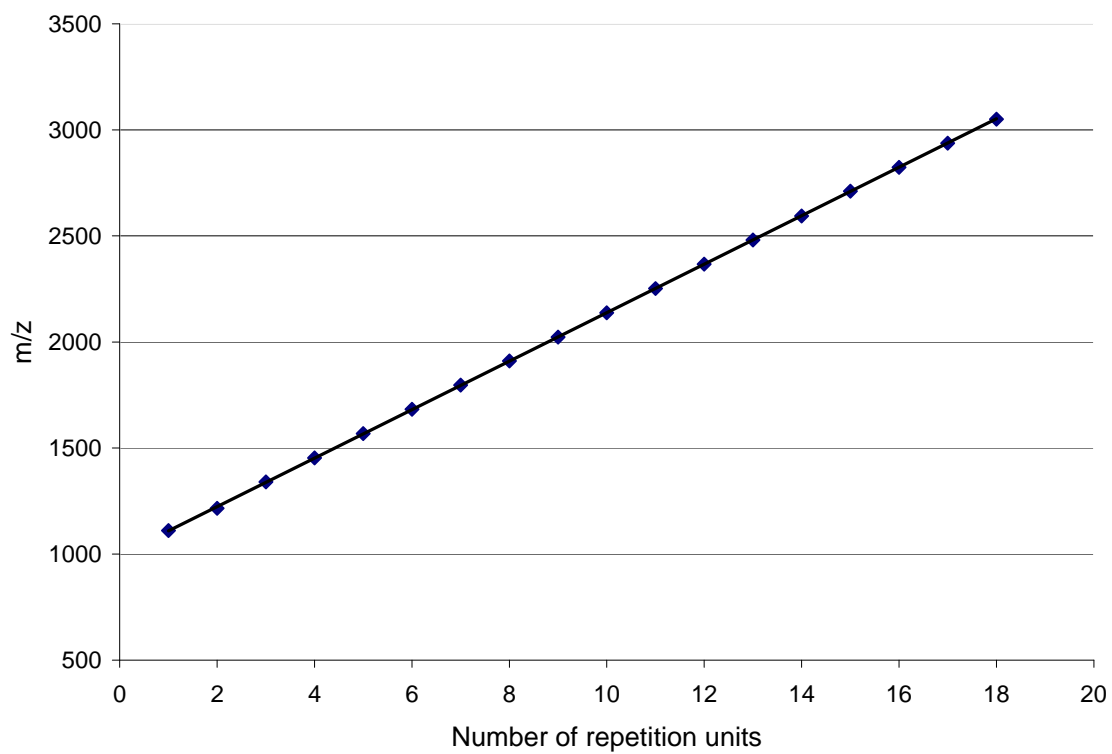

**Figure ESI 2.** Correlation between the  $m/z$  observed by MALDI-TOF. The relation observed is  $m/z = 114.3 N + 1000$  ( $R^2 = 1.00$ ), where  $N$  is the number of repetition units.

3-

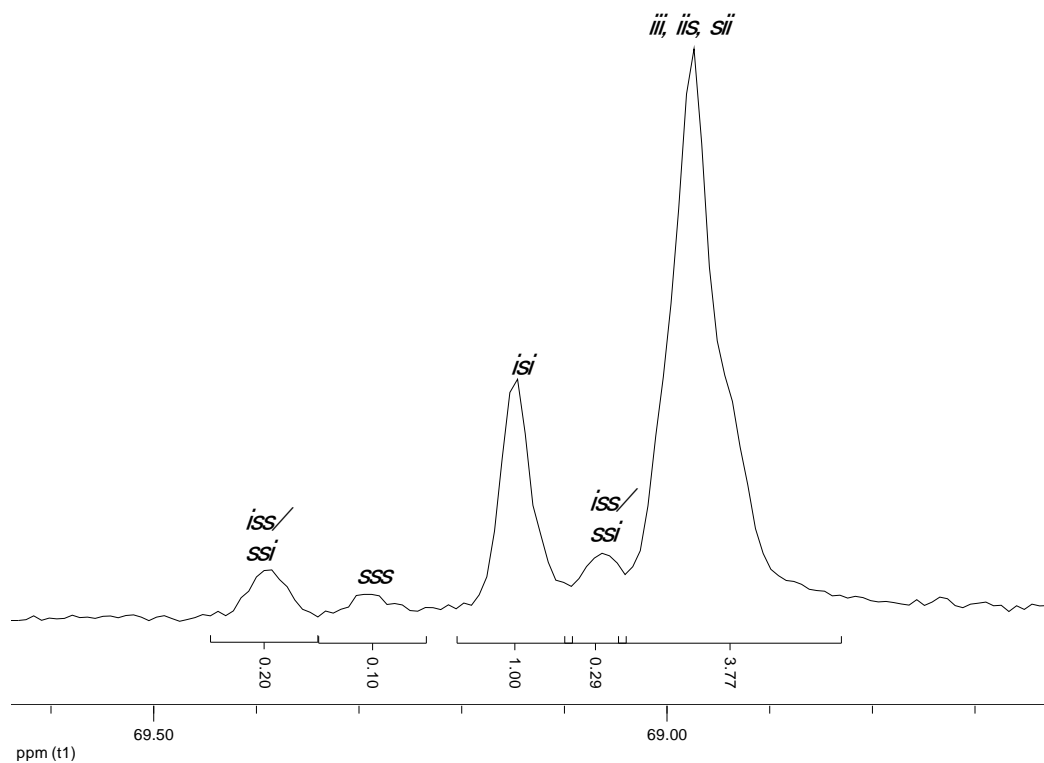

**Figure ESI 3.**  $^{13}\text{C}\{^1\text{H}\}$  experiments for the methylene carbons for the polylactides obtained from catalyst 6.
